# Supplementary material for: O‐GlcNAc Transferase Promotes Compensated Cardiac Function and Protein Kinase A O‐GlcNAcylation During Early and Established Pathological Hypertrophy From Pressure Overload
Source: PubMed Central journal article supplement — J Am Heart Assoc. 2019 May 25;8(11):e011260. doi: 10.1161/JAHA.118.011260 (PMC6585351; doi:10.1161/jaha.118.011260), 2019-05-25
Supplement: JAH3-8-e011260-s001.pdf [file JAH3-8-e011260-s001.pdf]

# **SUPPLEMENTAL MATERIAL**

**Table S1. Numerical values for the figure graphs.**

| Figure | Cont Sham                  | OGTKO Sham              | Cont TAC                   | OGTKO TAC                  |
|--------|----------------------------|-------------------------|----------------------------|----------------------------|
| 2A     | 1.96±0.09 au               | 0.39±0.04 au            | 1.65±0.11 au               | 0.62±0.12 au               |
| 2B     | 2.57±0.29 au               | 1.59±0.16 au            | 5.42±0.32 au               | 2.06±0.22 au               |
| 3A     | 1.70±0.05 au               | 0.60±0.07 au            | 1.70±0.06 au               | 0.69±0.10 au               |
| 3B     | 5.56±1.02 au               | 2.73±0.45 au            | 5.54±0.23 au               | 1.86±0.33 au               |
| 3D     | 0.61±0.04 au               | n/a                     | 0.86±0.05 au               | n/a                        |
| 4      | 182.3±17.6 $\mu\text{M}^2$ | 231±8.8 $\mu\text{M}^2$ | 323.1±34.6 $\mu\text{M}^2$ | 442.1±22.3 $\mu\text{M}^2$ |
| 5      | 1.4±0.1%                   | 1.4±0.2%                | 5.2±0.5%                   | 5.7±0.6%                   |
| 6      | 0.07±0.01%                 | 0.11±0.02%              | 0.41±0.08%                 | 0.42±0.06%                 |
| 7A     | 0.62±0.01 au               | 0.51±0.04 au            | 1.05±0.01 au               | 1.28±0.11 au               |
| 7B     | 0.52±0.06 au               | 0.51±0.06 au            | 1.15±0.14 au               | 1.12±0.02 au               |
| 7C     | 0.53±0.09 au               | 0.13±0.03 au            | 0.86±0.9 au                | 0.19±0.09 au               |
| 7D     | 1.1±0.1 au                 | n/a                     | 1.6±0.1 au                 | n/a                        |
| 7E     | 0.48±0.04 au               | 0.10±0.02 au            | 1.04±0.15 au               | 0.26±0.11 au               |
| 8A     | 1.5±0.1 au                 | 1.1±0.1 au              | n/a                        | n/a                        |
| 8B     | n/a                        | n/a                     | 0.44±0.18 au               | 0.18±0.03 au               |
| 8C     | 0.48±0.05 au               | n/a                     | 0.84±0.08 au               | n/a                        |
| 8D     | 6.4±0.4 au                 | 4.7±0.3 au              | 9.8±0.9 au                 | 3.7±0.3 au                 |
| 9A     | 0.88±0.12 au               | 0.46±0.08 au            | n/a                        | n/a                        |
| 9B     | n/a                        | n/a                     | 0.89±0.61 au               | 0.61±0.02 au               |
| 9C     | 0.64±0.07                  | n/a                     | 0.54±0.10                  | n/a                        |
| 9D     | 1.5±0.1 au                 | 1.0±0.1 au              | 2.0±0.1 au                 | 1.5±0.1 au                 |
| 10A    | 1.2±0.1 au                 | 0.8±0.1 au              | n/a                        | n/a                        |
| 10B    | n/a                        | n/a                     | 1.2±0.1 au                 | 0.8±0.1 au                 |
| 10C    | 0.87±0.06 au               | n/a                     | 0.60±0.06 au               | n/a                        |
| 10D    | 1.4±0.2 au                 | 0.9±0.1 au              | n/a                        | n/a                        |
| 10E    | n/a                        | n/a                     | 1.9±0.1 au                 | 1.3±0.1 au                 |
| 10F    | 1.9±0.2 au                 | n/a                     | 2.3±0.3 au                 | n/a                        |

Numerical means  $\pm$  standard errors of the means are shown for all graphs within the respective figures. Statistical significance and number of replicates per group are shown in the figures. au, arbitrary units;  $\mu\text{M}^2$ , micrometers squared, n/a, not applicable.
